# Supplementary material for: Eco-physiological responses of copepods and pteropods to ocean warming and acidification
Source: PubMed Central journal article supplement (PMC6426838; doi:10.1038/s41598-019-41213-1), 2019-03-18
Supplement: 41598_2019_41213_MOESM1_ESM.pdf [file 41598_2019_41213_MOESM1_ESM.pdf]

## Eco-physiological responses of copepods and pteropods to ocean warming and acidification

J. Engström-Öst, O. Glippa, R. A. Feely, M. Kanerva, J. E. Keister, S. R. Alin, B. R. Carter, A. K. McLaskey, K. A. Vuori, N. Bednaršek

**Supplementary Table S1.** Number of onshore and offshore biomarker samples collected at CTD stations 64-135.

| Station | Samples        |                 |
|---------|----------------|-----------------|
|         | <i>Calanus</i> | <i>Limacina</i> |
| 64      | 1              |                 |
| 77      | 1              |                 |
| 78      | 1              | 1               |
| 79      | 2              |                 |
| 85      | 1              |                 |
| 92      | 2              |                 |
| 93      | 2              | 3               |
| 94      |                | 2               |
| 99      | 5              | 2               |
| 100     |                | 2               |
| 101     |                | 2               |
| 105     |                | 2               |
| 106     | 2              | 5               |
| 122     | 7              | 3               |
| 127     | 1              | 2               |
| 128     | 4              |                 |
| 129     | 1              | 1               |
| 130     | 1              |                 |
| 135     | 4              |                 |

|  |                  |
|--|------------------|
|  | offshore > 200 m |
|  | onshore ≤ 200 m  |
